# Supplementary material for: A microscopic spatially confined strategy to realize completely reversible self-healing lattice restoration of MoS2 for ultrastable reversible sodium-ion storage
Source: Royal Society of Chemistry journal article supplement (doi:10.1039/d1nj01928g), 2021-01-01
Supplement: d1nj01928g1.pdf [file d1nj01928g1.pdf]

## Supplementary Information

A spatially-microscopic-confined strategy to realize the completely reversible self-healing lattice restoration of MoS<sub>2</sub> anode for ultralong cycling performance sodium-ion batteries

Wei Tian,<sup>a</sup> Jin Tian,<sup>a</sup> Naiming Lin,<sup>b</sup> Ye Liu,<sup>c, d\*</sup> Hui Zeng,<sup>a</sup> Shuo Dang,<sup>a</sup> Zhongqing Jiang<sup>e\*</sup> and Zhongde Wang<sup>c\*</sup>

<sup>a</sup> China United Northwest Institute for Engineering Design and Research Corporation, Xi'an, 710077, China.

<sup>b</sup> College of Materials Science and Engineering, Taiyuan University of Technology, Taiyuan, 030024, China.

<sup>c</sup> Department of Chemical Engineering, Taiyuan University of Technology, Taiyuan, 030024, China.

<sup>d</sup> School of Chemistry and Chemical Engineering, Yantai University, Yantai, 264005, China.

<sup>e</sup> Department of Physics, Zhejiang Sci-tech University, Hangzhou, 310018, China.

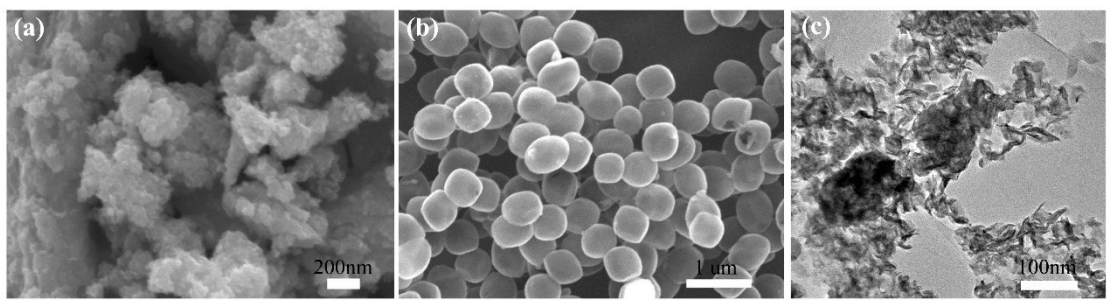

**Figure S1.** (a-b) SEM images of MoS<sub>2</sub> and N-doped carbon nanoboxes, (c) TEM image of MoS<sub>2</sub>.

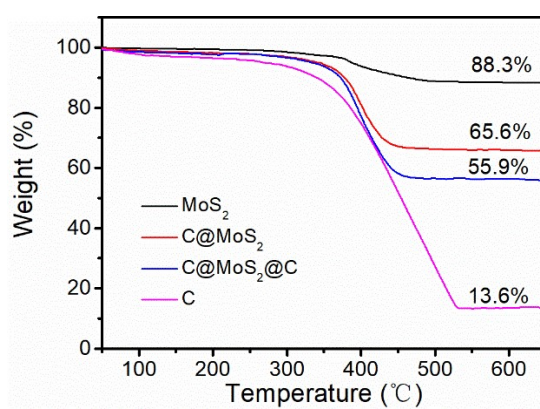

**Figure S2.** TGA curves of C@MoS<sub>2</sub>@C, C@MoS<sub>2</sub>, MoS<sub>2</sub> and C.

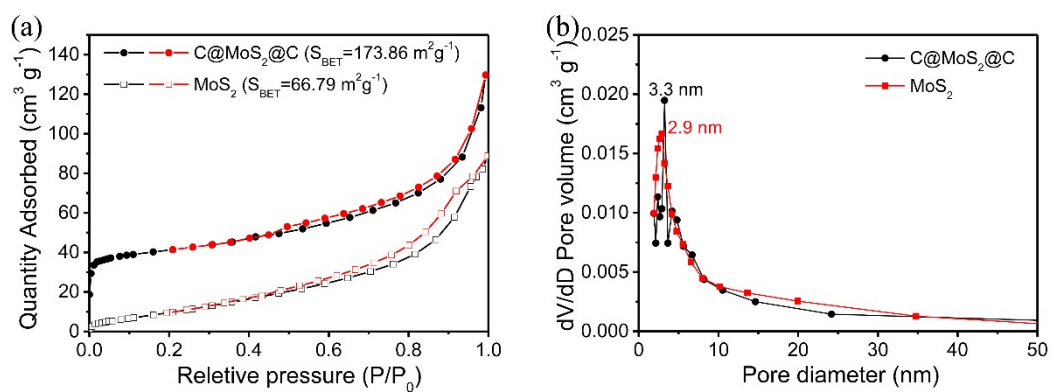

**Figure S3.** (a) N<sub>2</sub> adsorption-desorption isotherms of the MoS<sub>2</sub> and C@MoS<sub>2</sub>@C, (b) the pore-size distributions of the MoS<sub>2</sub> and C@MoS<sub>2</sub>@C.

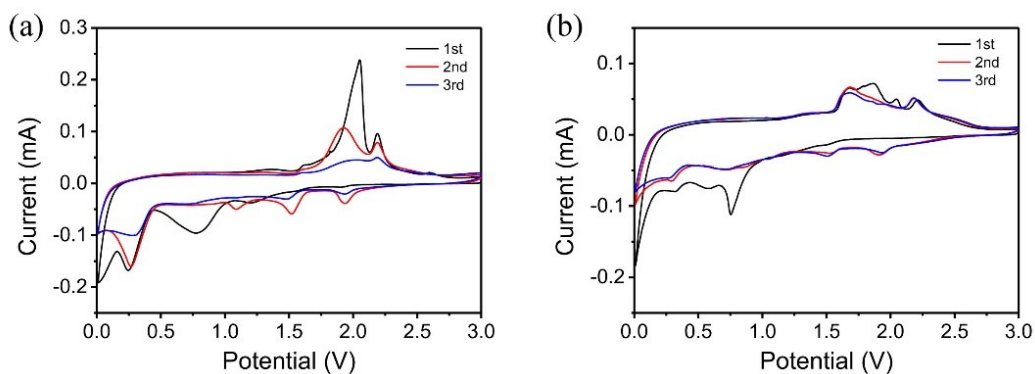

**Figure S4.** (a) CV curves of MoS<sub>2</sub> based electrode; (b) CV curves of C@MoS<sub>2</sub> based electrode.

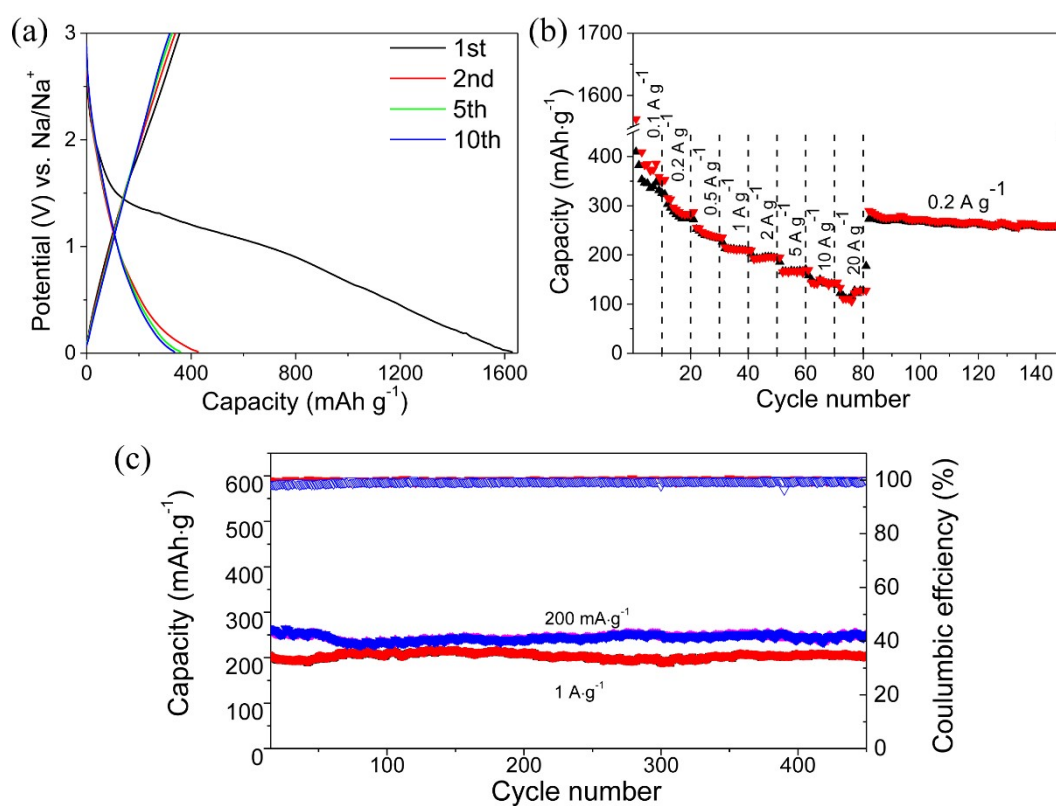

**Figure S5.** (a) The galvanostatic charge/discharge profiles for the 1st, 2nd, 5th and 10th cycles of the C electrode at a current density of 0.05 A g<sup>-1</sup>; (b) Rate performance of C electrode; (c) Cycling performance of the C electrode at a current rate of 0.2 and 1.0 A g<sup>-1</sup>

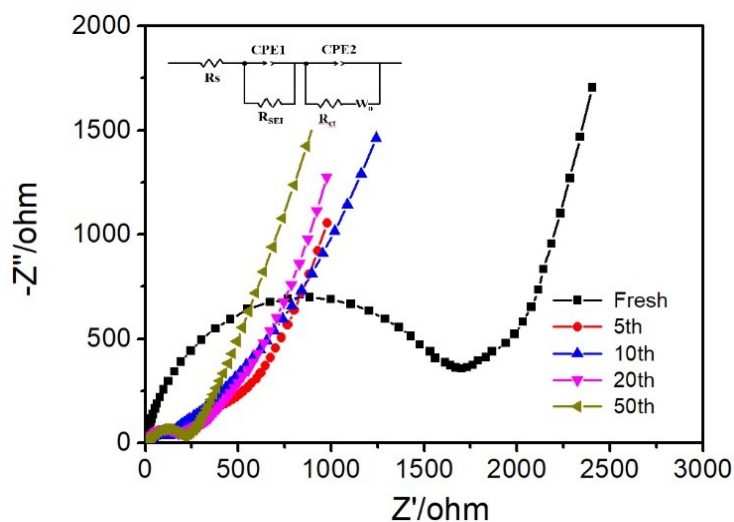

**Figure S6.** Nyquist plots of C@MoS<sub>2</sub>@C electrode at the different cycle numbers (inset: equivalent-circuit diagram)

**Table S1.** The fitted data of the C@MoS<sub>2</sub>@C electrode.

| Sample                | State            | R <sub>s</sub> (Ω) | R <sub>SEI</sub> (Ω) | R <sub>ct</sub> (Ω) |
|-----------------------|------------------|--------------------|----------------------|---------------------|
| C@MoS <sub>2</sub> @C | Before discharge | 2.74               | 0                    | 1219.39             |
|                       | After 5 cycles   | 2.78               | 8.08                 | 9.43                |
|                       | After 10 cycles  | 2.65               | 12.28                | 18.63               |
|                       | After 20 cycles  | 2.68               | 14.51                | 162.90              |
|                       | After 50 cycles  | 2.96               | 14.84                | 194.51              |

**Table S2.** Rate capacity and cycling performance comparison of the C@MoS<sub>2</sub>@C based electrode with the reported MoS<sub>2</sub>-based ones with long cycle life in literatures.

| Materials                             | Rate capacity (mA h g <sup>-1</sup> ) | Cycling performance         |                                  | [Ref] |
|---------------------------------------|---------------------------------------|-----------------------------|----------------------------------|-------|
|                                       |                                       | current density cycles (th) | Capacity (mA h g <sup>-1</sup> ) |       |
| MoS <sub>2</sub> /C <sub>6</sub> PCCS | 270 (2 A g <sup>-1</sup> )            | 1 A g <sup>-1</sup> (300)   | 337                              | [1]   |
|                                       | 194 (4 A g <sup>-1</sup> )            |                             |                                  |       |
| Few-layered MoS <sub>2</sub> /C       | 374 (1 A g <sup>-1</sup> )            | 1 A g <sup>-1</sup> (300)   | 350                              | [2]   |
|                                       | 349 (2 A g <sup>-1</sup> )            |                             |                                  |       |
| MoS <sub>2</sub> /C                   | 267 (2 A g <sup>-1</sup> )            | 2 A g <sup>-1</sup> (5000)  | 128                              | [3]   |
|                                       | 242 (5 A g <sup>-1</sup> )            |                             |                                  |       |
| CC@CN@MoS <sub>2</sub>                | 306 (1 A g <sup>-1</sup> )            | 1 A g <sup>-1</sup> (1000)  | 265                              | [4]   |
|                                       | 235 (2 A g <sup>-1</sup> )            |                             |                                  |       |
| E-MoS <sub>2</sub> /carbon fibers     | 164 (5A g <sup>-1</sup> )             | 1 A g <sup>-1</sup> (700)   | 241                              | [5]   |
|                                       | 138 (10A g <sup>-1</sup> )            |                             |                                  |       |

|                             |                                   |                                    |              |                  |
|-----------------------------|-----------------------------------|------------------------------------|--------------|------------------|
|                             | 104 (20A g <sup>-1</sup> )        | 5 A g <sup>-1</sup> (3000)         | 127          |                  |
|                             |                                   | 10 A g <sup>-1</sup> (3000)        | 109          |                  |
| US-MoS <sub>2</sub> @NG.    | 141 (12.8 A g <sup>-1</sup> )     | 1 A g <sup>-1</sup> (1000)         | 198          | [6]              |
|                             | <b>309 (1 A g<sup>-1</sup>)</b>   |                                    |              |                  |
|                             | <b>281.9 (2 A g<sup>-1</sup>)</b> |                                    |              |                  |
| <b>C@ MoS<sub>2</sub>@C</b> | <b>247.2 (5A g<sup>-1</sup>)</b>  | <b>1 A g<sup>-1</sup> (1000)</b>   | <b>324.1</b> | <b>This work</b> |
|                             | <b>222.2 (10A g<sup>-1</sup>)</b> | <b>10 A g<sup>-1</sup> (10000)</b> | <b>163.9</b> |                  |
|                             | <b>200 (20A g<sup>-1</sup>)</b>   |                                    |              |                  |
|                             |                                   |                                    |              |                  |

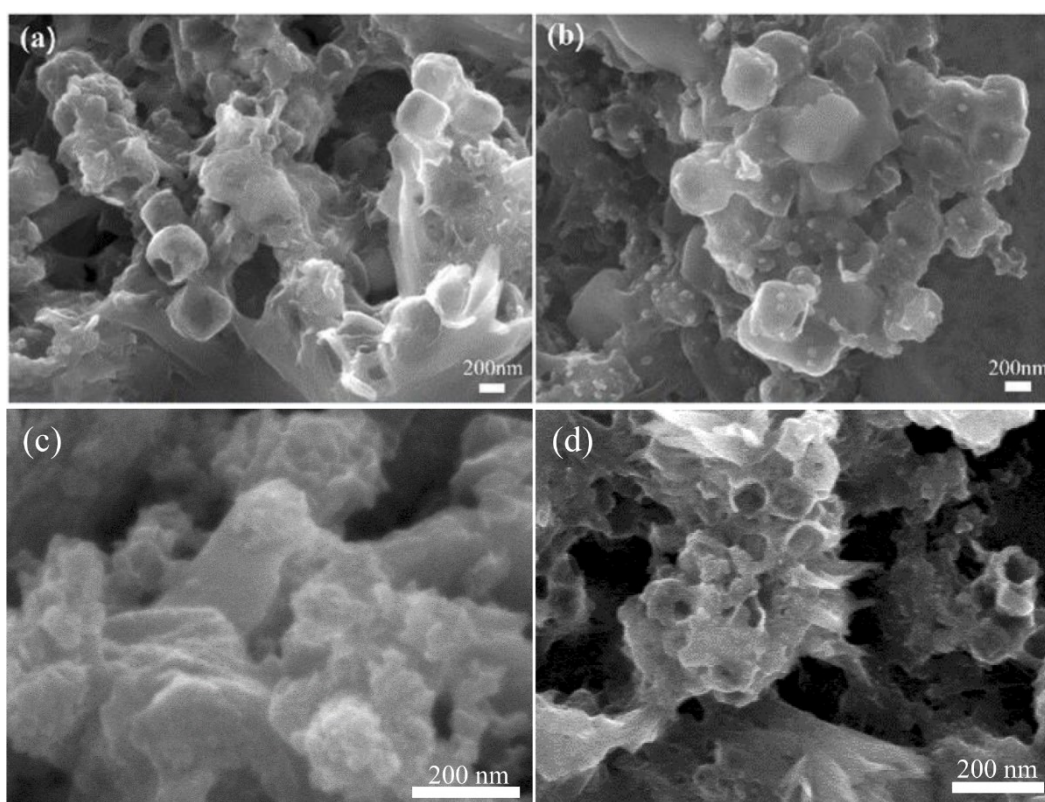

**Figure S7.** (a) SEM images of C@MoS<sub>2</sub>@C based electrode after the 3400th cycle at a current of 1A g<sup>-1</sup> and (b) after the 10,000th cycle at a current of 10A g<sup>-1</sup>; (c, d) SEM images of pure MoS<sub>2</sub> and C@MoS<sub>2</sub> based electrodes after the 2000th cycle at a current of 1A g<sup>-1</sup>.

#### References

1. B. Wang, Y. Xia, G. Wang, Y. Zhou and H. Wang, *Chem. Eng. J.*, 2017, **309**, 417-425.
2. P. Zhang, F. Qin, L. Zou, M. Wang, K. Zhang, Y. Lai and J. Li, *Nanoscale*, 2017, **9**, 12189-12195.
3. Y. Cai, H. Yang, J. Zhou, Z. Luo, G. Fang, S. Liu, A. Pan and S. Liang, *Chem. Eng. J.*, 2017, **327**, 522-529.
4. W. Ren, H. Zhang, C. Guan and C. Cheng, *Adv. Funct. Mater.*, 2017, **27**, 1702116.
5. C. Zhao, C. Yu, M. Zhang, Q. Sun, S. Li, M. N. Banis, X. Han, Q. Dong, J. Yang and G. Wang, *Nano Energy*, 2017, **41**, 66-74.
6. X. Xu, R. Zhao, W. Ai, B. Chen, H. Du, L. Wu, H. Zhang, W. Huang and T. Yu, *Adv Mater*, 2018, **30**, 1800658.
